# Supplementary material for: Biophysical regulation of Chlamydia pneumoniae-infected monocyte recruitment to atherosclerotic foci
Source: PubMed Central journal article supplement (PMC4726309; doi:10.1038/srep19058), 2016-01-20
Supplement: srep19058-s1.pdf [file srep19058-s1.pdf]

**Biophysical regulation of *Chlamydia pneumoniae*-infected monocyte  
recruitment to atherosclerotic foci**

Shankar J. Evani, Anand K. Ramasubramanian

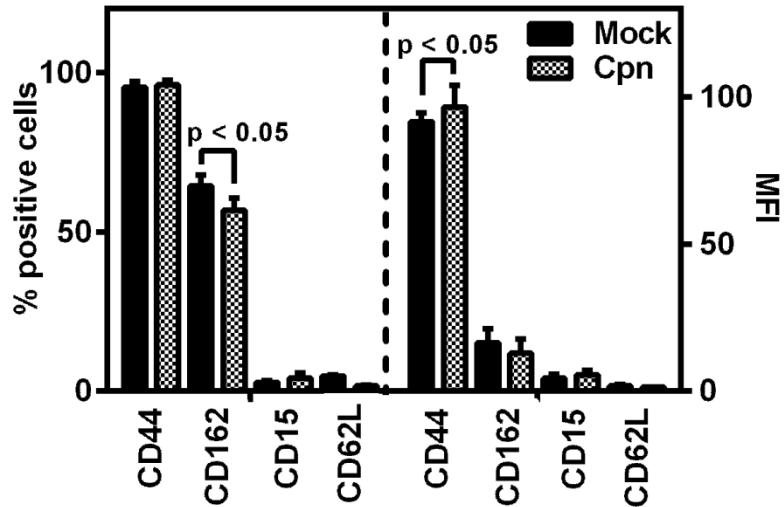

**Figure S1. Expression levels of rolling receptors on monocytes.** Uninfected or infected monocytes were stained for CD44/CD15/CD162/CD62L. The cells were analyzed by image stream flow cytometry for percentage cells bound with antibody against CD44/CD15/CD162/CD62L and their mean fluorescence intensity. The results are mean  $\pm$  SEM of three different experiments performed in triplicate. The \* denote statistically significant change in the parameters between the groups ( $P < 0.05$ , ANOVA).

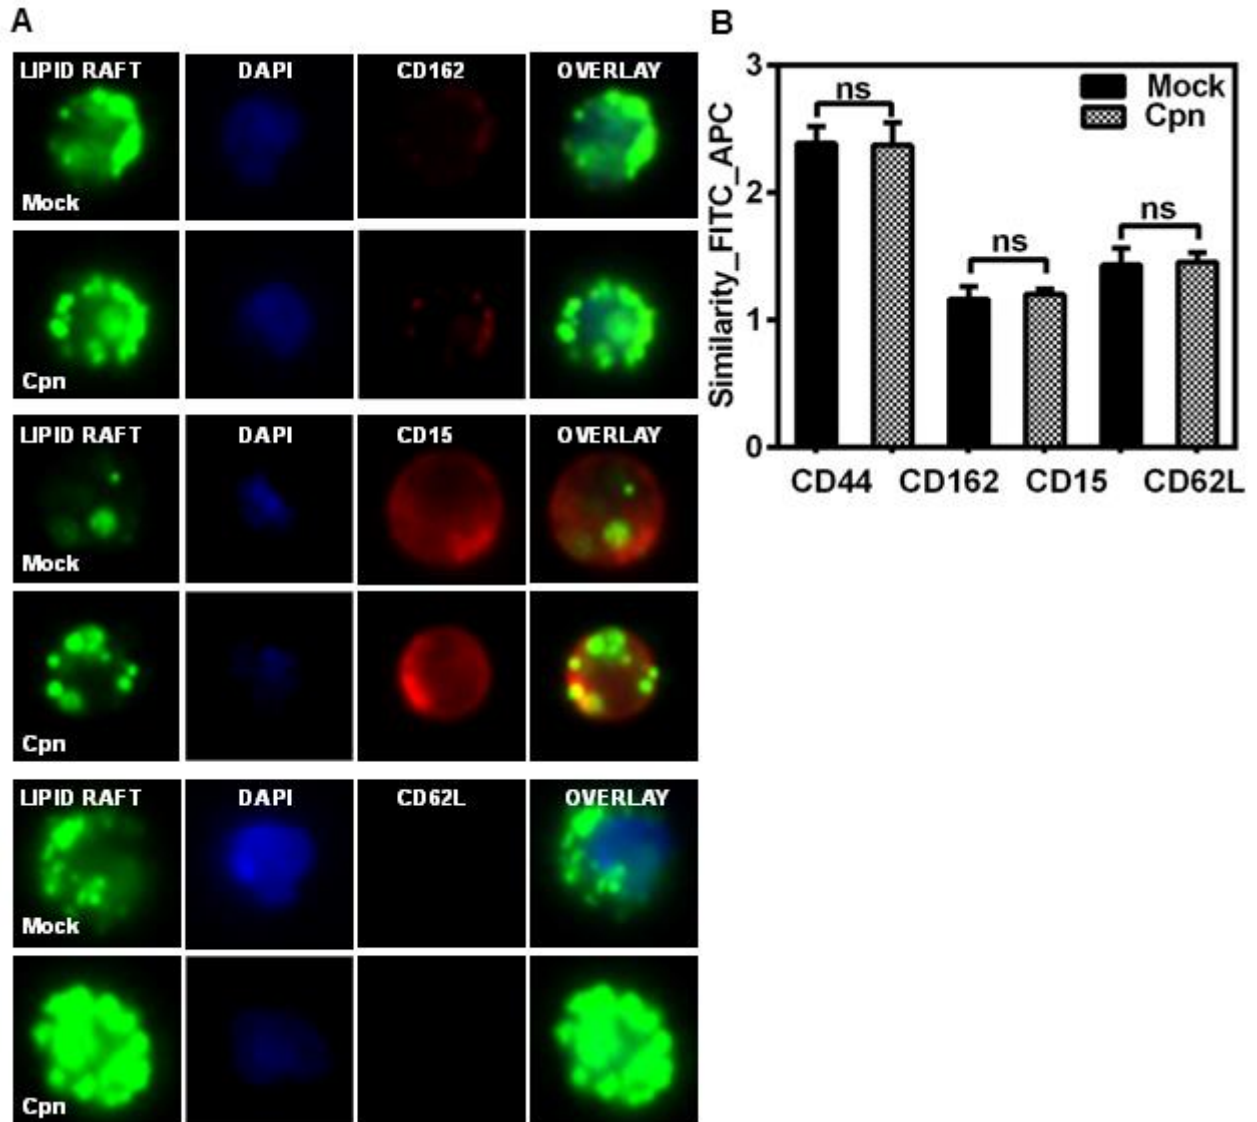

**Figure S2. Expression levels of rolling receptors on monocytes.** Uninfected or infected monocytes were stained for CD44/CD15/CD162/CD62L (red), lipid raft stain (green) and nucleus (Blue). The cells were analyzed by image stream flow cytometry with representative images (**A**); and Co-localization of CD15/CD162/CD62L with lipid rafts (**B**). The results are mean  $\pm$  SEM of three different experiments performed in triplicate. The \* denote statistically significant change in the parameters between the groups ( $P < 0.05$ , ANOVA).

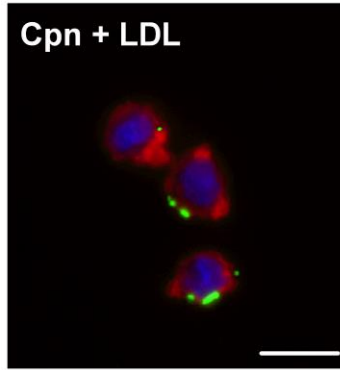

**Figure S3. *Chlamydial infection in monocytes with LDL.*** Monocytes were infected with Chlamydial EB (MOI 1) for 4 h and were exposed to 100  $\mu\text{g/ml}$  of LDL for additional 4 h. The cells were stained for *C. pneumoniae* (green), actin (red), and nucleus (blue). The bar represents 20  $\mu\text{m}$ . A representative image is shown and the experiment is performed three times in triplicate.

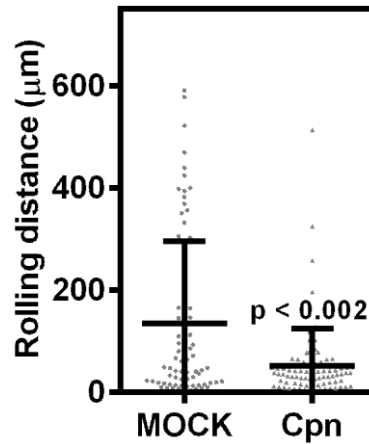

**Figure S4. 40 h infection shows increased rolling of monocytes on endothelium.**

Monocytes were infected with Chlamydial EB (MOI 1) for 40 h hours. The cells were then re-suspended at a concentration of 0.5 million/ml in media and perfused on activated aortic endothelium at  $1 \text{ dyn/cm}^2$ , and the interactions were visualized by video microscopy. Rolling distance of monocytes before firm arrest was estimated and the results are mean  $\pm$  SEM of one representative experiment performed in triplicate, and the experiments were repeated three times.
